# Supplementary material
Source: HighWire-hosted journal article supplement (https://cmaj.ca/highwire/filestream/58760/field_highwire_adjunct_files/1/physical-payne-2-at.pdf)
Supplement: physical-payne-2-at.pdf [file physical-payne-2-at.pdf]

## Appendix 2 (as supplied by the authors): Definitions used to identify potentially preventable admissions

Definitions used to identify potentially preventable admissions<sup>1</sup>

| Condition                       | ICD 10 codes                                         | Notes                                                                                   |
|---------------------------------|------------------------------------------------------|-----------------------------------------------------------------------------------------|
| Ear, nose and throat infections | H66, J028, J029, J038, J039, J06, J321               | Principal diagnosis                                                                     |
| Dental conditions               | K02, K03, K04, K05, K06, K08                         | Principal diagnosis                                                                     |
| Convulsions and epilepsy        | G40, G41, R56, O15                                   | Principal diagnosis                                                                     |
| Gangrene                        | R02                                                  | Any diagnosis                                                                           |
| Nutritional deficiencies        | E40, E41, E43, E550, E643, M833                      | Principal diagnosis                                                                     |
| Dehydration and gastroenteritis | E86, K522, K528, K529                                | Principal diagnosis                                                                     |
| Pyelonephritis                  | N10, N11, N12                                        | Principal diagnosis                                                                     |
| Perforated bleeding ulcer       | K25, K26, K27, K28 each with .0, .1, .2, .4, .5, .6. | Principal diagnosis                                                                     |
| Cellulitis                      | L03, L04, L080, L088, L089, L980                     | Principal diagnosis. Exclude episodes with following main ops S06 S57 S68 S70 W90 X11   |
| Pelvic inflammatory disease     | N70, N73                                             | Principal diagnosis                                                                     |
| Influenza and pneumonia         | J13, J181, J10, J11                                  | Any diagnosis                                                                           |
| Other vaccine preventable       | A36, A370, A379, A35, A80, B05, B06, B161, B169, B26 | Any diagnosis                                                                           |
| Iron deficiency anaemia         | D501, D508, D509                                     | Principal diagnosis                                                                     |
| Asthma                          | J45, J46                                             | Principal diagnosis                                                                     |
| Diabetes complications          | E10, E11, E12, E13, E14 each with .0 - .8            | Any diagnosis. Exclude the .9's                                                         |
| Hypertension                    | I10, I119                                            | Principal diagnosis. Exclude episodes with following main ops K01 - K50, K56, K60 - K61 |
| Angina                          | I20                                                  | Principal diagnosis. Exclude episodes with main ops K40 K45 K49 K60 K65 K66             |
| COPD                            | J41, J42, J43, J44, J47, J20                         | Principal diagnosis. Only include J20 if diag2 has one of J41 - J44, J47                |
| Congestive Heart Failure        | I50, I110, J81                                       | Principal diagnosis. Exclude episodes with following main ops K01 - K50, K56, K60 - K61 |

### Reference

1. ISD Scotland. Navigator user guide: Potentially preventable admissions indicator. v4.05. 2010. NHS National Services Scotland.
